# Supplementary material for: Proteomic Insights Into Susceptibility and Resistance to Chronic-Stress-Induced Depression or Anxiety in the Rat Striatum
Source: Front Mol Biosci. 2021 Oct 5;8:730473. doi: 10.3389/fmolb.2021.730473 (PMC8523913; doi:10.3389/fmolb.2021.730473)
Supplement: Supplementary file 3 [file Table1.XLSX]

## Sheet: A scheduled  inclusion list
UniProt accession	Protein	Peptide	Mass [m/z]	CS [z]	Polarity	Start [min]	End [min]	(N)CE	(N)CE type
D4A280	Pak5	GFLDLMLVR	532.302	2	Positive	67.7	75.7	28	NCE
		SSYLHQTSPQPAMR	534.928	3	Positive	18.4	26.4	28	NCE
O88763	Pik3c3	GIIPETATLFK	595.345	2	Positive	51.1	59.1	28	NCE
		SALMPAQLFFK	626.842	2	Positive	59.2	67.2	28	NCE
		SLLAAQQTFVDR	674.865	2	Positive	38.4	46.4	28	NCE
P11517	Hbb2	ATVSGLWGK	459.756	2	Positive	30.8	38.8	28	NCE
		FGDLSSASAIMGNPQVK	861.43	2	Positive	47.4	55.4	28	NCE
P49620	Dgkg	WYLEVMPR	547.279	2	Positive	50.6	58.6	28	NCE
P62744	Ap2s1	FILIQNR	452.274	2	Positive	31.7	39.7	28	NCE
		HTNFVEFR	525.262	2	Positive	21.2	29.2	28	NCE
Q02293	Fntb	FEGGFQGR	449.214	2	Positive	18	26	28	NCE
		FNHLVPR	441.751	2	Positive	12	20	28	NCE
		IQEVFSSYK	550.785	2	Positive	28.8	36.8	28	NCE
Q3B7D0	Cpox	FGLFTPGSR	491.261	2	Positive	40.1	48.1	28	NCE
Q6AYD9	Nudt19	ASQEPSIALSPPAGLADWR	983.505	2	Positive	57.9	65.9	28	NCE
Q6F596	Ggps1	YLLQLPGK	466.284	2	Positive	40.2	48.2	28	NCE
Q7M730	Scn4b	ILIDGIVK	435.787	2	Positive	38.3	46.3	28	NCE
		YTCFVR	423.202	2	Positive	19.9	27.9	28	NCE
Q9ES53	Ufd1	FVAFSGEGQSLR	649.33	2	Positive	35.5	43.5	28	NCE
		IIMPPSALDQLSR	720.898	2	Positive	49.8	57.8	28	NCE
Q9ESM0	Ip6k1	YDDHTVCKPLISR	535.268	3	Positive	19.1	27.1	28	NCE
Q9Z2Q7	Stx8	GLGFDEIR	453.738	2	Positive	36.2	44.2	28	NCE
		LLLASFK	396.255	2	Positive	37.7	45.7	28	NCE
		LTLTIR	358.737	2	Positive	28	36	28	NCE
B2RZB7	Snrpd1	EPVQLETLSIR	642.862	2	Positive	42.5	50.5	28	NCE
		NREPVQLETLSIR	518.958	3	Positive	33.9	41.9	28	NCE
D3ZF13	Ndufab1	LMCPQEIVDYIADK	847.91	2	Positive	66.2	74.2	28	NCE
		LSVNSHFMK	531.774	2	Positive	20.8	28.8	28	NCE
		LYDKIDPEK	374.201	3	Positive	17	25	28	NCE
D3ZHK4	Rb1cc1	ALIQNLEK	464.777	2	Positive	25.3	33.3	28	NCE
		ELEDTLHIR	375.868	3	Positive	28.1	36.1	28	NCE
		STELVLSPDMPR	672.845	2	Positive	40.4	48.4	28	NCE
D4A648	Stk4	SWTVEDLQK	553.28	2	Positive	28.6	36.6	28	NCE
E9PST5	Acin1	SAPLLPLTR	484.3	2	Positive	34.5	42.5	28	NCE
		VVDEKPPIIR	389.236	3	Positive	19.4	27.4	28	NCE
G3V7Q7	Iqgap1	LEGVLPEVAQHYQDTLIR	694.372	3	Positive	52.5	60.5	28	NCE
		TLQALQIPAAK	577.351	2	Positive	34.9	42.9	28	NCE
Q5FVC4	Dnajb12	DYYEILGVSR	607.806	2	Positive	52.1	60.1	28	NCE
		EGLLYR	375.711	2	Positive	22.7	30.7	28	NCE
		VTALIESLNQK	608.351	2	Positive	34	42	28	NCE

## Sheet: PRM data
UniProt accession	Protein	PRM data based on peak areas																				Normalized PRM data																				Fold change ( vs Ctrl)
		Ctrl					Dep-Sus					Anx-Sus					Insus					Ctrl					Dep-Sus					Anx-Sus					Insus					Dep-Sus					Anx-Sus
		Ctrl_1	Ctrl_2	Ctrl_3	Ctrl_4	Ctrl_5	Dep-Sus_1	Dep-Sus_2	Dep-Sus_3	Dep-Sus_4	Dep-Sus_5	Anx-Sus_1	Anx-Sus_2	Anx-Sus_3	Anx-Sus_4	Anx-Sus_5	Insus_1	Insus_2	Insus_3	Insus_4	Insus_5	Ctrl_1	Ctrl_2	Ctrl_3	Ctrl_4	Ctrl_5	Dep-Sus_1	Dep-Sus_2	Dep-Sus_3	Dep-Sus_4	Dep-Sus_5	Anx-Sus_1	Anx-Sus_2	Anx-Sus_3	Anx-Sus_4	Anx-Sus_5	Insus_1	Insus_2	Insus_3	Insus_4	Insus_5	Dep-Sus_1	Dep-Sus_2	Dep-Sus_3	Dep-Sus_4	Dep-Sus_5	Anx-Sus_1	Anx-Sus_2	Anx-Sus_3
D4A280	Pak5	3727610	2523879	3112166	3197452	2512642	6439667	4851518	6436213	3088586	5128356	3768533	3562957	1954143	3074728	4058773	2790028	3851733	2161252	2042691	3096113	0.0036779	0.00286259	0.00328095	0.00399131	0.00345637	0.00650064	0.00560444	0.00685448	0.00400433	0.00603431	0.00361845	0.00402272	0.00331929	0.00443266	0.00429321	0.0034164	0.00446927	0.0027062	0.00264699	0.00428602	1.88216	1.62268	1.9846	1.15939	1.74714	1.04766	1.16471	0.961048
O88763	Pik3c3	13138649	10258722	9568616	14532889	10775463	12917598	10928261	10994212	9123721	10449638	10794107	10144221	5718313	8700034	9421730	8480813	9416308	8769289	7708100	7469224	0.0129634	0.0116355	0.0100876	0.0181411	0.0148226	0.0130399	0.0126243	0.0117087	0.0118288	0.0122956	0.0103642	0.0114532	0.00971309	0.0125423	0.00996594	0.0103848	0.010926	0.0109804	0.00998842	0.0103398	0.963774	0.933053	0.865384	0.874265	0.908765	0.766015	0.846503	0.71789
P11517	Hbb2	9145146	21743386	19880490	5839184	16526521	79173396	226040212	7019060	82932536	56398250	326903382	35539432	13459706	10545074	44499132	90638425	46188640	36332587	60459744	88566274	0.0090232	0.0246614	0.0209587	0.00728893	0.0227337	0.0799231	0.26112	0.0074752	0.107521	0.0663614	0.313884	0.0401254	0.0228626	0.0152022	0.0470695	0.110987	0.0535939	0.0454936	0.0783458	0.122604	4.7199	15.4206	0.441452	6.34974	3.91901	18.5366	2.36963	1.35016
P49620	Dgkg	1140440	823900	947808	1012074	619836	1023078	1072090	1334975	1335610	1317821	916180	1366672	531439	1070342	1413955	1033521	1000552	940838	1241825	716470	0.00112523	0.000934471	0.000999212	0.00126335	0.00085264	0.00103277	0.00123847	0.00142173	0.00173161	0.00155062	0.000879692	0.00154303	0.000902698	0.00154305	0.00149563	0.00126555	0.00116097	0.00117806	0.0016092	0.000991826	0.997859	1.19661	1.37368	1.67308	1.49821	0.849959	1.49087	0.872188
P62744	Ap2s1	1551772355	1201562916	1257730851	1295253349	1182390200	1494690433	1225858961	1310487899	971810939	1092909121	1423196812	1269573499	554553836	995374504	1220877786	1057037837	1231489101	1106157752	1071297862	1003562060	1.53108	1.36282	1.32594	1.61684	1.62648	1.50884	1.4161	1.39565	1.25995	1.28598	1.36652	1.4334	0.941961	1.43497	1.2914	1.29435	1.42893	1.38507	1.38822	1.38925	1.01086	0.948729	0.935027	0.84411	0.861551	0.915508	0.960315	0.631074
Q02293	Fntb	21750085	17761674	19258521	15966095	17758902	18423216	15849783	18415446	17973065	16073909	20851120	16022381	8623923		17987383	19167020	17314205	20069035	17814757	17043260	0.0214601	0.0201454	0.020303	0.0199302	0.024429	0.0185977	0.0183096	0.0196122	0.023302	0.0189135	0.0200207	0.0180899	0.0146485		0.0190264	0.0234701	0.0200901	0.0251293	0.023085	0.0235934	0.87504	0.861484	0.922774	1.09638	0.889899	0.941995	0.851149	0.689229
Q3B7D0	Cpox	7549122	5926196	4677973	6365761	6724357	5160895	5591371	4569657	4149202	4675524	5552864	4865332	1752512	2987256	4527966	4798781	4141648	3851732	4447051	3994212	0.00744846	0.00672152	0.00493168	0.00794625	0.00924996	0.00520976	0.00645911	0.00486662	0.00537941	0.00550149	0.00533172	0.00549315	0.0029768	0.00430655	0.00478951	0.00587613	0.00480567	0.00482292	0.00576264	0.00552928	0.71764	0.889738	0.670373	0.74101	0.757825	0.734439	0.756677	0.410052
Q6AYD9	Nudt19	2477333	1942121	2197345	1856436	1440592	2118328	1672275	2252859	2220740	1685977		2126012	1737096	2036234	2395608	2086540	1973720	1908198	1680240	1642360	0.0024443	0.00220276	0.00231652	0.00231735	0.00198166	0.00213839	0.0019318	0.00239926	0.00287917	0.00198382		0.00240035	0.00295062	0.00293552	0.00253398	0.00255498	0.00229016	0.00238934	0.00217731	0.00227356	0.949331	0.857618	1.06515	1.2782	0.88071		1.06563	1.30992
Q6F596	Ggps1	2659407	1178179	1496527	1880553	2393388	1917857	2325036	1922325	1554822	1832938	1742996	1426994	529088	1368816	1534966	1734736	1444607	1223005		1348889	0.00262394	0.0013363	0.00157769	0.00234746	0.00329232	0.00193602	0.00268587	0.00204725	0.00201582	0.00215674	0.00167358	0.00161113	0.000898705	0.00197334	0.00162363	0.00212419	0.00167622	0.00153138		0.0018673	0.866017	1.20144	0.915773	0.901713	0.96475	0.748624	0.72069	0.402008
Q7M730	Scn4b	224021605	347249803	271644037	272299919	242152378	238863738	239831269	225629716	192944926	211582616	386530016	279121282	136635431	235209816	317668515	267405096	270858240	297000115	252137890	262737298	0.221034	0.393852	0.286377	0.339906	0.333102	0.241126	0.277051	0.240292	0.250152	0.24896	0.371136	0.315139	0.232088	0.339088	0.336017	0.327439	0.314284	0.371887	0.326729	0.363713	0.765832	0.879935	0.763186	0.7945	0.790715	1.17875	1.0009	0.737128
Q9ES53	Ufd1	39108270	32780917	25085498	29826996	20591029	32098018	28449080	24888471	22837444	27092147	27995677	22704979	16246111	18471425	24426232	24964315		17477186	23383659	21588823	0.0385868	0.0371803	0.026446	0.0372324	0.0283248	0.032402	0.0328642	0.0265059	0.0296086	0.0318782	0.0268807	0.0256348	0.0275955	0.0266292	0.0258371	0.0305689		0.0218839	0.0303014	0.0298859	0.965664	0.97944	0.789945	0.882415	0.950054	0.801117	0.763985	0.82242
Q9ESM0	Ip6k1	3170084	2593569	2921286	2674107	2839445	3556247	3419996	2986579	3028504	3620849	3561499	3157709	1259789	2748394	2994757	3189834	2966097	3055068	2731339	2691194	0.00312781	0.00294164	0.00307972	0.00333803	0.00390591	0.00358992	0.00395076	0.00318066	0.00392644	0.0042605	0.00341966	0.00356518	0.00213987	0.0039622	0.00316774	0.00390597	0.00344164	0.00382538	0.00353936	0.00372548	1.09495	1.205	0.970122	1.19759	1.29948	1.04302	1.0874	0.652673
Q9Z2Q7	Stx8	20573732	17355135	22093079	22568376	15551223	25380037	23903261	23978647	20220342	21864019	28987127	25437060	11917085	20557411	24665541	20729421	25282149	23640318	20249078	21624999	0.0202994	0.0196843	0.0232913	0.0281716	0.0213921	0.0256204	0.0276129	0.0255369	0.0262155	0.0257264	0.0278327	0.0287194	0.0202423	0.0296364	0.0260903	0.0253833	0.0293356	0.0296011	0.0262395	0.029936	1.13526	1.22356	1.13157	1.16164	1.13997	1.2333	1.27259	0.896956
B2RZB7	Snrpd1	79131302	64633917	64354346	52535158	70098546	99284509	100883148	113352417	81366722	91218593	117063094	106636584	50075133	89253988	93725330	95331380	99707824	86941802	79134967	84117961	0.0780761	0.0733081	0.0678446	0.0655786	0.0964269	0.100225	0.11654	0.120719	0.105491	0.107333	0.112401	0.120397	0.0850573	0.128672	0.099139	0.116734	0.115694	0.108864	0.102546	0.116446	1.31448	1.52845	1.58326	1.38355	1.4077	1.47417	1.57904	1.11555
D3ZF13	Ndufab1	302594462	350442784	264562658	315207932	250743576	357785849	261710078	306741047	292108703	288994214	265789550	291441085	150030734		230910886	223689631	259361804	290415998	216065504	280374642	0.298559	0.397474	0.278911	0.393468	0.34492	0.361174	0.302326	0.326675	0.378717	0.340047	0.255204	0.329048	0.254841		0.244249	0.273909	0.300944	0.363642	0.279985	0.388129	1.05401	0.882274	0.953332	1.10521	0.992356	0.74476	0.960259	0.7437
D3ZHK4	Rb1cc1	12290868	10024796	9838008	7992174	8631435	13295773	12229133	11872502	10794007	10547269	12447491	12130209	4873646	8668809	10254222	9217384	10725952	8975586	8868189	8238444	0.012127	0.0113702	0.0103716	0.00997647	0.0118733	0.0134217	0.014127	0.012644	0.0139944	0.0124105	0.0119518	0.0136955	0.00827834	0.0124973	0.0108465	0.0112867	0.0124456	0.0112387	0.0114917	0.0114047	1.20442	1.26771	1.13464	1.25581	1.11368	1.07251	1.22899	0.742872
D4A648	Stk4	1637534	1444215	1425346	1725351	1548096	1638158	1609175	1615281	1378884	1569404	1586983	1844891	546324	1518031	1469222	1350742	1462530	1246120	1291346	1220622	0.0016157	0.00163804	0.00150265	0.00215372	0.00212955	0.00165367	0.00185891	0.00172025	0.00178771	0.00184665	0.00152378	0.00208295	0.000927982	0.00218846	0.00155409	0.00165399	0.00169701	0.00156032	0.00167337	0.00168974	0.914676	1.0282	0.951504	0.988818	1.02142	0.842831	1.15212	0.513284
E9PST5	Acin1	7909322	6117057	7196294	6673165	5798346	10401460	9650634	11365394	7006599	9507073	7651026	8276244	4249311	7780163	6306818	6554915	6107829	7350256	5522311	7300606	0.00780385	0.00693799	0.00758658	0.00832998	0.00797615	0.0105	0.0111483	0.012104	0.00908401	0.0111866	0.00734632	0.0093442	0.00721785	0.0112162	0.00667111	0.00802652	0.00708708	0.00920357	0.007156	0.0101064	1.35888	1.4428	1.56647	1.17563	1.44774	0.950744	1.20931	0.934118
G3V7Q7	Iqgap1	5037570	4255800	4708692	4437455	3373059	7561151	5792891	5706277	5327015	5063478	5985267	5941512	2832331	4343825	4754181	5684495	6497170	4258475	4700434	4570662	0.0049704	0.00482695	0.00496407	0.00553918	0.00463995	0.00763275	0.00669191	0.00607711	0.00690644	0.00595798	0.0057469	0.0067082	0.00481098	0.00626224	0.00502879	0.00696069	0.00753884	0.00533222	0.00609098	0.00632727	1.53019	1.34157	1.21832	1.38458	1.19444	1.15212	1.34484	0.964489
Q5FVC4	Dnajb12	18800030	19692330	17998068	13371605	13027635	20929619	18134409	17856215	13904522	16241215	21090049	19304914	10003729	12804579	16827898	19367832	19760716	17948023	18085888	16621984	0.0185493	0.0223351	0.0189742	0.0166915	0.0179207	0.0211278	0.0209487	0.0190166	0.0180271	0.0191103	0.0202501	0.021796	0.0169923	0.0184596	0.0177999	0.023716	0.0229289	0.0224735	0.0234363	0.0230102	1.11822	1.10874	1.00648	0.95411	1.01144	1.07177	1.15358	0.899339
iRT peptides		1013515076	881675401	948555279	801102558	726960850	990619947	865655987	938979455	771311253	849865565	1041477949	885708892	588722600	693653336	945392852	816657087	861826043	798630906	771703474	722374761
[truncated: 7 more columns]
